# Supplementary material for: Lactobacillus helveticus-Derived Whey-Calcium Chelate Promotes Calcium Absorption and Bone Health of Rats Fed a Low-Calcium Diet
Source: MDPI journal article supplement (doi:10.3390/nu16081127), 2024-04-11
Supplement: s1 [file s1]

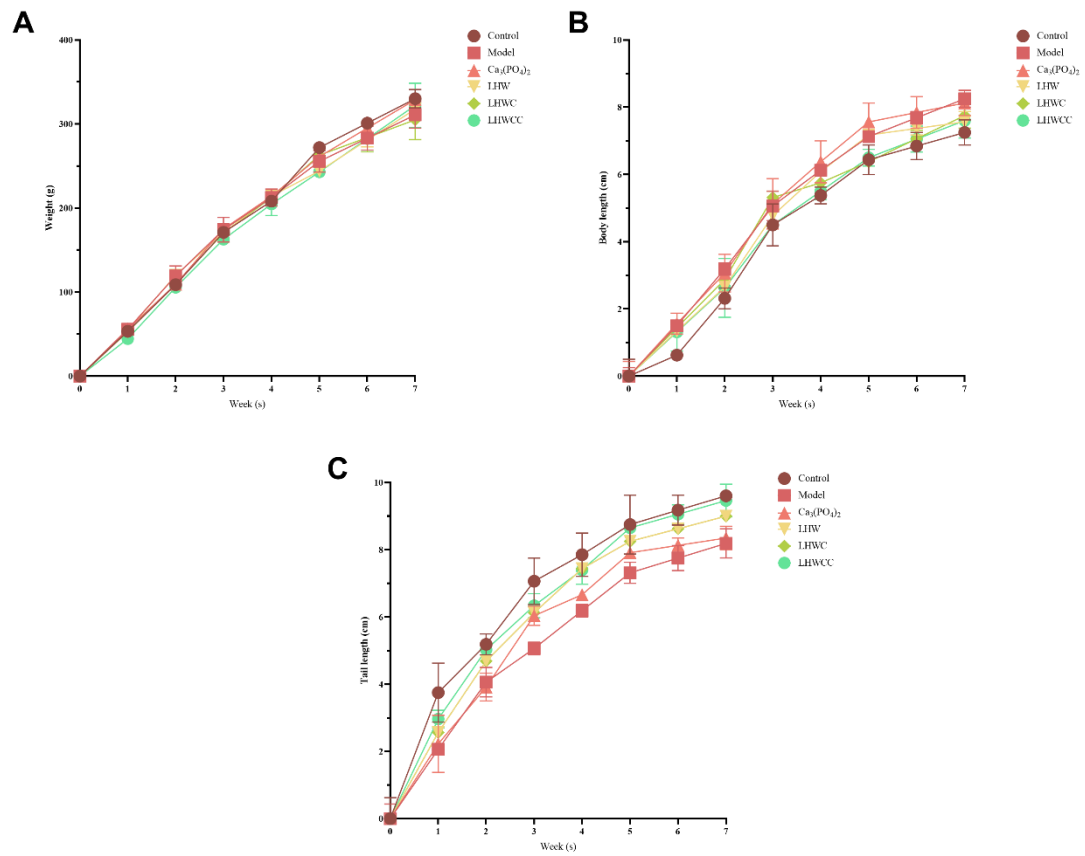

Figure S1 Changes in body weight, body length and tail length of rats (A), weight (B), body length (C), tail length.
